# Supplementary material for: Impact of Leptin on the Expression Profile of Macrophages during Mechanical Strain In Vitro
Source: MDPI journal article supplement (doi:10.3390/ijms231810727), 2022-09-14
Supplement: s1 [file s1]

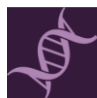

Article

# Impact of Leptin on Macrophages during Mechanical Strain

## 1. Uncropped Westernblots

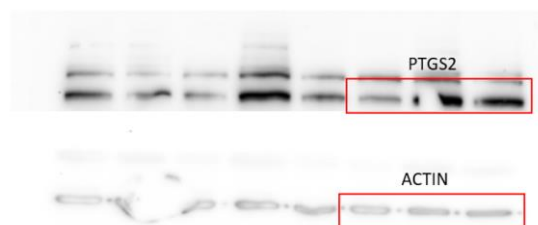

**Figure S1.** Uncropped Western Blot for Fig. 4h.

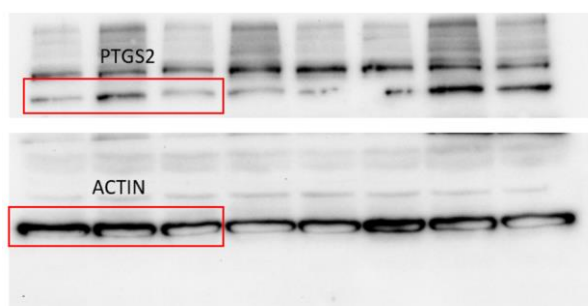

**Figure S2.** Uncropped Western Blot for Fig. 5h.

## 2 Cell Numbers and LDH Release after Different Conditions

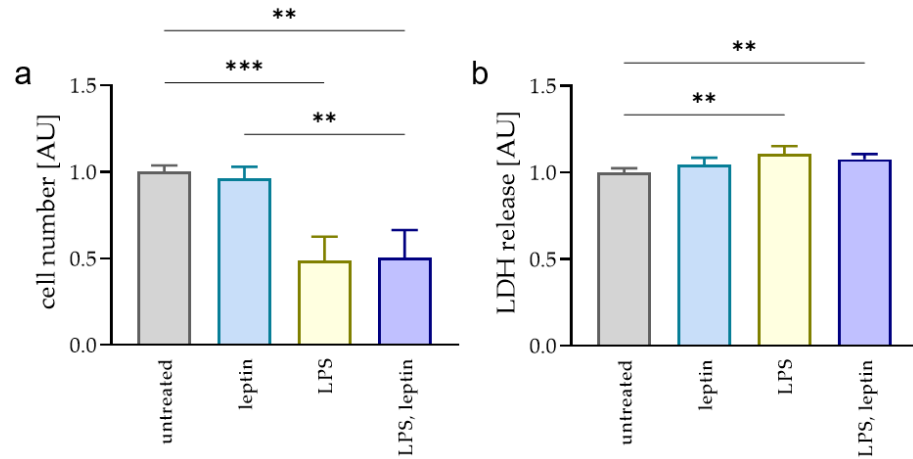

**Figure S3.** Impact of leptin, *Porphyromonas gingivalis* LPS and a combination of both on cell number (a) and lactatdehydrogenase (LDH) release. n n=6; Statistics: Welch-corrected ANOVA with Dunnett's T3 multiple comparisons test; \*\*  $P < 0.01$ , \*\*\*  $P < 0.001$ .

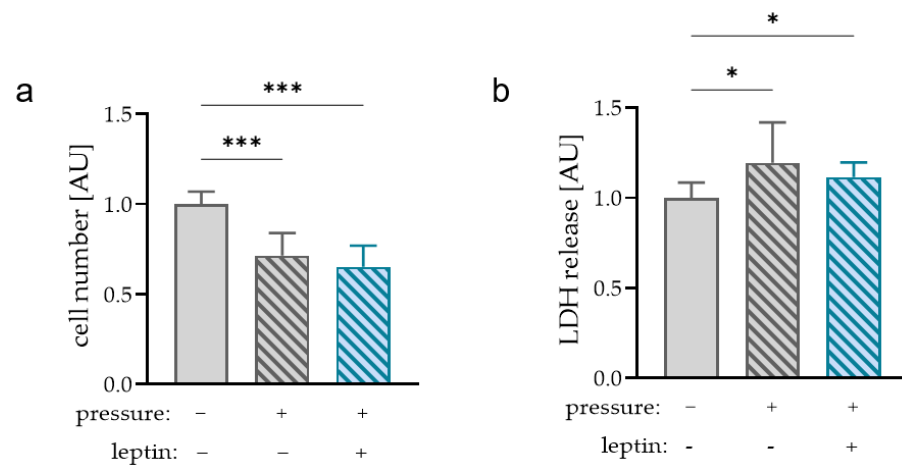

**Figure S4.** Impact of leptin in combination with compressive strain on cell number (a) and lactatdehydrogenase (LDH) release. n≥9; Statistics: Welch-corrected ANOVA with Dunnett's T3 multiple comparisons test; \*  $P < 0.05$ , \*\*\*  $P < 0.001$ .

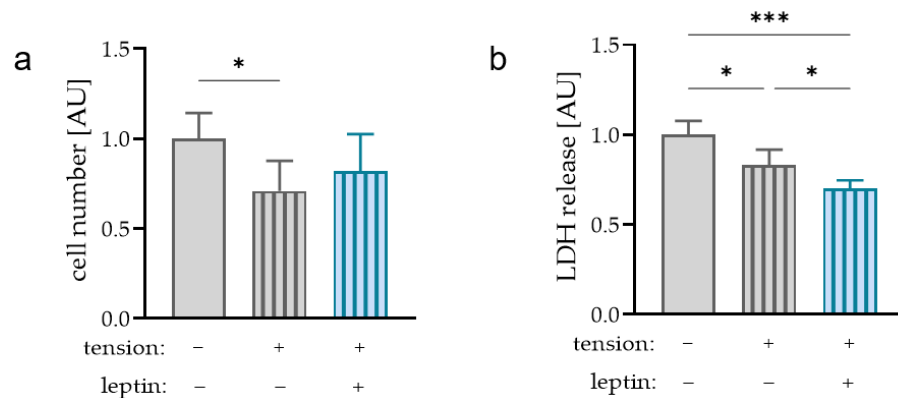

**Figure S5.** Impact of leptin in combination with tensile strain on cell number (a) and lactatdehydrogenase (LDH) release. n=6; Statistics: Welch-corrected ANOVA with Dunnett's T3 multiple comparisons test; \*  $P < 0.05$ , \*\*\*  $P < 0.001$ .
